# Supplementary material
Source: PubMed Central journal article supplement (PMC6147245)
Supplement: NIHMS983660-supplement-1.pdf [file NIHMS983660-supplement-1.pdf]

Supplementary Table 1: Total prescriptions and expenditures by time since diagnosis (n=20,146)

|                                               | Newly diagnosed<br>(n=962) |                 | Previously diagnosed<br>(n=3,258) |                 | Non-cancer control<br>(n=15,926) |                 |
|-----------------------------------------------|----------------------------|-----------------|-----------------------------------|-----------------|----------------------------------|-----------------|
| Total unique prescriptions,<br>median (range) | 6.3                        | (0 – 36)        | 5.8                               | (0 – 41)        | 4.1                              | (0 – 47)        |
| ≥5 unique prescriptions,<br>n (weighted %)    | 617                        | (67.2)          | 2032                              | (63.2)          | 7472                             | (51.0)          |
| Total prescriptions,<br>median (range)        | 34.0                       | (0 – 420)       | 33.7                              | (0 – 457)       | 22.7                             | (0 – 578)       |
| Total expenditures,<br>median (range)         | \$1,823                    | (\$0 – 272,283) | \$1,821                           | (\$0 – 264,329) | \$998                            | (\$0 – 220,510) |

Supplementary Table 2. Opioid/narcotic analgesic and NSAID use among respondents with arthritis (n=8,880)

|                            | Newly diagnosed<br>(n=454) |             | Previously Diagnosed<br>(n=1,756) |             | Non-Cancer Control<br>(n=6,670) |             |
|----------------------------|----------------------------|-------------|-----------------------------------|-------------|---------------------------------|-------------|
|                            | wt %                       | 95% CI      | wt %                              | 95% CI      | wt %                            | 95% CI      |
| Opioid/ narcotic analgesic | 50.2                       | 45.1 – 55.3 | 35.5                              | 32.6 – 38.4 | 30.5                            | 28.9 – 32.0 |
| NSAID                      | 18.0                       | 14.0 – 22.0 | 20.2                              | 17.9 – 22.5 | 21.3                            | 20.1 – 22.4 |

Abbreviations: wt, weighted; CI, confidence interval; NSAID, nonsteroidal anti-inflammatory drug
